# Supplementary material for: Mindfulness Practice with a Brain-Sensing Device Improved Cognitive Functioning of Elementary School Children: An Exploratory Pilot Study
Source: MDPI journal article supplement (doi:10.3390/brainsci12010103), 2022-01-12
Supplement: s1 [file s1]

**Figure S1.** Timing of the computer-based neuropsychology tasks

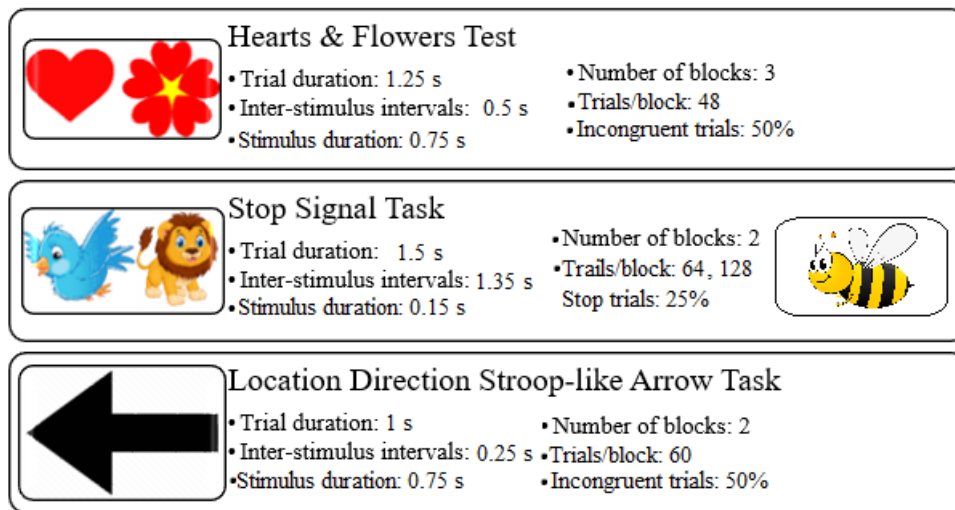

**Table S1.** The content and protocol of the mindfulness program with the Muse brain-sensing device for school-aged children

| Session | Objective                                                                                                                      | Activities                                                                                                                                                                                                                                                                                                                  |
|---------|--------------------------------------------------------------------------------------------------------------------------------|-----------------------------------------------------------------------------------------------------------------------------------------------------------------------------------------------------------------------------------------------------------------------------------------------------------------------------|
| 1       | Introduction of the Muse Interaxon headband, and the neurofeedback system                                                      | <ul style="list-style-type: none"> <li>• Conversation about attention with/without awareness, and the nature of attention with the puppy metaphor</li> <li>• Breathing awareness meditation</li> <li>• Conversation about the child's current state of attention based on the Muse application results</li> </ul>           |
| 2       | Children will be able to understand the neurofeedback system, and practice how to guide their attention to the breathing       | <ul style="list-style-type: none"> <li>• Reminder: repetition of the instruction</li> <li>• Breathing awareness meditation</li> <li>• Conversation about the child's current state of attention based on the Muse application results</li> </ul>                                                                            |
| 3       | Children will be able to notice the body sensations connected to breathing, and use them as an anchor of attentional awareness | <ul style="list-style-type: none"> <li>• Tips &amp; Tricks: body sensation during inhalation and exhalation, and how to use them as an anchor for awareness</li> <li>• Breathing awareness meditation</li> <li>• Conversation about the child's current state of attention based on the Muse application results</li> </ul> |
| 4       | Children will be able to use body sensation as anchors to breathing awareness, and to intentionally pay attention to breathing | <ul style="list-style-type: none"> <li>• Reminder: repetition of bodily sensations as anchors of attention</li> <li>• Breathing awareness meditation</li> <li>• Conversation about the child's current state of attention based on the Muse application results</li> </ul>                                                  |

|   |                                                                                                                                           |                                                                                                                                                                                                                                                                                                                           |
|---|-------------------------------------------------------------------------------------------------------------------------------------------|---------------------------------------------------------------------------------------------------------------------------------------------------------------------------------------------------------------------------------------------------------------------------------------------------------------------------|
| 5 | Children will be able to notice their current state of attention, and accept it without judgement or evaluation                           | <ul style="list-style-type: none"> <li>• Conversation about the changing nature of attention (e.g., concentration, mind-wandering) and accepting as it is</li> <li>• Breathing awareness meditation</li> <li>• Conversation about the child's current state of attention based on the Muse application results</li> </ul> |
| 6 | Children will be able to accept their current state of attention, and develop a kind non-judgemental attitude towards themselves          | <ul style="list-style-type: none"> <li>• Reminder: repetition of acceptance and non-judgemental attitude towards our own current state</li> <li>• Breathing awareness meditation</li> <li>• Conversation about the child's current state of attention based on the Muse application results</li> </ul>                    |
| 7 | Children will be able to focus their attention for a longer period of time                                                                | <ul style="list-style-type: none"> <li>• Breathing awareness meditation</li> <li>• Conversation about the child's current state of attention based on the Muse application results</li> </ul>                                                                                                                             |
| 8 | Children will be able to master the skills required for intentionally paying attention to their own breathing for a longer period of time | <ul style="list-style-type: none"> <li>• Breathing awareness meditation</li> <li>• Conversation about the child's current state of attention based on the Muse application results</li> </ul>                                                                                                                             |

**Table S2.** Significant statistical outliers and missing data in the statistical models

| <b>Statistical model no. 1</b> |             |                        | <b>Missing data (n)</b>                                                                                                 |
|--------------------------------|-------------|------------------------|-------------------------------------------------------------------------------------------------------------------------|
| Location                       | Direction   | Stroop-like Arrow test | absence from school (1)                                                                                                 |
| Hearts & Flowers test          |             |                        | logging error (1)                                                                                                       |
| SST                            |             |                        | failure to estimate the SSRT, or Mean RT, or omissions due to incorrect switching of finger-stimulus assignment (10-13) |
| TMT                            |             |                        | logging error (1)                                                                                                       |
| Resting-state brain activity   | eyes-closed |                        | <5 retained segments of EEG data due to high noise ratio (7)                                                            |
| Resting-state brain activity   | eyes-open   |                        | <5 retained segments of EEG data due to high noise ratio (6)                                                            |
| <b>Statistical model no. 2</b> |             |                        | <b>Excluded significant statistical outliers (n)</b>                                                                    |
| Location                       | Direction   | Stroop-like Arrow test | direction block mean RT (5), location block correct responses (8)                                                       |
| Hearts & Flowers test          |             |                        | flowers block mean RT (4), flowers block errors (4), mixed block mean RT (4), mixed block errors (3)                    |
| TMT                            |             |                        | errors (3), completion time (2)                                                                                         |
| Resting-state brain activity   | eyes-closed |                        | theta & alpha (6), beta (6)                                                                                             |
| Resting-state brain activity   | eyes-open   |                        | theta & alpha (2), beta (1)                                                                                             |

TMT B Trail Making Test B version

**Table S3.** Results of the ANOVAs on EFs and brain activity in statistical model no. 1

| Statistical model No.1                            |                                                    |                                                 |                                                |
|---------------------------------------------------|----------------------------------------------------|-------------------------------------------------|------------------------------------------------|
| Dependent variable                                | Time                                               | Group                                           | Time × group                                   |
| <i>Hearts &amp; Flowers test</i>                  |                                                    |                                                 |                                                |
| Flowers block RT                                  | $F_{(1, 27)} = 14.533$ ,<br>$\eta_p^2 = .350^{**}$ | $F_{(1, 27)} = 0.106$ ,<br>$\eta_p^2 = .004$    | $F_{(1, 27)} = 0.167$ ,<br>$\eta_p^2 = .006$   |
| Mixed block RT                                    | $F_{(1, 27)} = 62.936$ ,<br>$\eta_p^2 = .700^{**}$ | $F_{(1, 27)} = 0.044$ ,<br>$\eta_p^2 = .002$    | $F_{(1, 27)} = 3.852$ ,<br>$\eta_p^2 = .125^+$ |
| Flowers block errors                              | $F_{(1, 27)} = 0.180$ ,<br>$\eta_p^2 = .007$       | $F_{(1, 27)} = 0.306$ ,<br>$\eta_p^2 = .011$    | $F_{(1, 27)} = 0.979$ ,<br>$\eta_p^2 = .035$   |
| Mixed block errors                                | $F_{(1, 27)} = 6.331$ ,<br>$\eta_p^2 = .190^*$     | $F_{(1, 27)} = 0.180$ ,<br>$\eta_p^2 = .007$    | $F_{(1, 27)} = 0.614$ ,<br>$\eta_p^2 = .022$   |
| <i>Location Direction Stroop-like Arrows test</i> |                                                    |                                                 |                                                |
| Location block RT                                 | $F_{(1, 28)} = 1.379$ ,<br>$\eta_p^2 = .047$       | $F_{(1, 28)} = 2.844$ ,<br>$\eta_p^2 = .090$    | $F_{(1, 28)} = 0.003$ ,<br>$\eta_p^2 = .001$   |
| Direction block RT                                | $F_{(1, 28)} = 0.513$ ,<br>$\eta_p^2 = .018$       | $F_{(1, 28)} = 6.777$ ,<br>$\eta_p^2 = .195^*$  | $F_{(1, 28)} = 0.101$ ,<br>$\eta_p^2 = .0004$  |
| Location block correct responses                  | $F_{(1, 28)} = 14.511$ ,<br>$\eta_p^2 = .341^{**}$ | $F_{(1, 28)} = 1.469$ ,<br>$\eta_p^2 = .050$    | $F_{(1, 28)} = 0.001$ ,<br>$\eta_p^2 = .001$   |
| Direction block correct responses                 | $F_{(1, 28)} = 35.856$ ,<br>$\eta_p^2 = .562^{**}$ | $F_{(1, 28)} = 1.026$ ,<br>$\eta_p^2 = .035$    | $F_{(1, 28)} = 0.221$ ,<br>$\eta_p^2 = .008$   |
| <i>Stop Signal Task</i>                           |                                                    |                                                 |                                                |
| SSRT                                              | $F_{(1, 19)} = 6.944$ ,<br>$\eta_p^2 = .268^*$     | $F_{(1, 19)} = 0.543$ ,<br>$\eta_p^2 = 0.028$   | $F_{(1, 19)} = 1.454$ ,<br>$\eta_p^2 = .071$   |
| Response Time                                     | $F_{(1, 19)} = 0.156$ ,<br>$\eta_p^2 = .008$       | $F_{(1, 19)} = 3.996$ ,<br>$\eta_p^2 = 0.174^+$ | $F_{(1, 19)} = 1.599$ ,<br>$\eta_p^2 = .078$   |
| % of omissions                                    | $F_{(1, 19)} = 0.267$ ,<br>$\eta_p^2 = .014$       | $F_{(1, 19)} = 3.308$ ,<br>$\eta_p^2 = 0.148$   | $F_{(1, 19)} = 1.412$ ,<br>$\eta_p^2 = .069$   |
| <i>Trail Making Test</i>                          |                                                    |                                                 |                                                |
| Errors                                            | $F_{(1, 26)} = 1.145$ ,<br>$\eta_p^2 = .041$       | $F_{(1, 26)} = 1.482$ ,<br>$\eta_p^2 = .052$    | $F_{(1, 26)} = 0.105$ ,<br>$\eta_p^2 = .040$   |
| Completion time                                   | $F_{(1, 26)} = 8.867$ ,<br>$\eta_p^2 = .254^*$     | $F_{(1, 26)} = 0.192$ ,<br>$\eta_p^2 = .007$    | $F_{(1, 26)} = 1.069$ ,<br>$\eta_p^2 = .040$   |
| <i>Resting-state EEG measurement</i>              |                                                    |                                                 |                                                |
| Theta (eyes-closed)                               | $F_{(1, 19)} = 4.575$ ,<br>$\eta_p^2 = .194^*$     | $F_{(1, 19)} = 0.097$ ,<br>$\eta_p^2 = 0.005$   | $F_{(1, 19)} = 0.582$ ,<br>$\eta_p^2 = .030$   |
| Alpha (eyes-closed)                               | $F_{(1, 19)} = 3.442$ ,<br>$\eta_p^2 = .153$       | $F_{(1, 19)} = 0.070$ ,<br>$\eta_p^2 = 0.004$   | $F_{(1, 19)} = 0.553$ ,<br>$\eta_p^2 = .028$   |
| Beta (eyes-closed)                                | $F_{(1, 19)} = 3.565$ ,<br>$\eta_p^2 = .158$       | $F_{(1, 19)} = 1.137$ ,<br>$\eta_p^2 = 0.156$   | $F_{(1, 19)} = 0.902$ ,<br>$\eta_p^2 = .045$   |
| Theta (eyes-open)                                 | $F_{(1, 20)} = 3.943$ ,<br>$\eta_p^2 = .165^+$     | $F_{(1, 20)} = 0.408$ ,<br>$\eta_p^2 = 0.020$   | $F_{(1, 20)} = 0.277$ ,<br>$\eta_p^2 = .014$   |
| Alpha (eyes-open)                                 | $F_{(1, 20)} = 5.164$ ,<br>$\eta_p^2 = .205^*$     | $F_{(1, 20)} = 0.452$ ,<br>$\eta_p^2 = 0.022$   | $F_{(1, 20)} = 0.052$ ,<br>$\eta_p^2 = .003$   |
| Beta (eyes-open)                                  | $F_{(1, 20)} = 6.718$ ,<br>$\eta_p^2 = .251^*$     | $F_{(1, 20)} = 0.889$ ,<br>$\eta_p^2 = 0.043$   | $F_{(1, 20)} = 2.530$ ,<br>$\eta_p^2 = .112$   |

RT reaction time in milliseconds (ms); SST Stop Signal Task; SSRT Stop Signal Reaction Time in milliseconds (ms); TMT Trail Making Test; Completion time in seconds (s);  $\eta_p^2$  partial eta squared effect size; effect size ( $\eta_p^2$ ) interpreted as :small – 0.01, medium – 0.06, large – 0.14; +  $p < 0.06$ ; \* $p < 0.05$ ; \*\* $p < 0.001$ .
